# Supplementary material
Source: PubMed Central journal article supplement (PMC6325305)
Supplement: ba026658-suppl1.pdf [file ba026658-suppl1.pdf]

**Supplement table 1- List of sequenced genes**

|               |               |               |              |               |               |               |                |
|---------------|---------------|---------------|--------------|---------------|---------------|---------------|----------------|
| <i>ASXL1</i>  | <i>CBLB</i>   | <i>DNMT3A</i> | <i>IDH1</i>  | <i>KMT2A</i>  | <i>NOTCH1</i> | <i>PTPN11</i> | <i>TET2</i>    |
| <i>ATM</i>    | <i>CCND1</i>  | <i>EP300</i>  | <i>IDH2</i>  | <i>KMT2C</i>  | <i>NOTCH2</i> | <i>RUNX1</i>  | <i>TNFAIP3</i> |
| <i>BCOR</i>   | <i>CCND3</i>  | <i>ETV6</i>   | <i>IKZF1</i> | <i>KMT2D</i>  | <i>NPM1</i>   | <i>SETBP1</i> | <i>TP53</i>    |
| <i>BIRC3</i>  | <i>CD79A</i>  | <i>EZH2</i>   | <i>IL7R</i>  | <i>KRAS</i>   | <i>NRAS</i>   | <i>SF3B1</i>  | <i>U2AF1</i>   |
| <i>BRAF</i>   | <i>CD79B</i>  | <i>FBXW7</i>  | <i>JAK1</i>  | <i>MEF2B</i>  | <i>PAX5</i>   | <i>SPI1</i>   | <i>UBR5</i>    |
| <i>BTK</i>    | <i>CDKN2A</i> | <i>GATA1</i>  | <i>JAK2</i>  | <i>MIR142</i> | <i>PDGFRA</i> | <i>SRSF2</i>  | <i>WHSC1</i>   |
| <i>CALR</i>   | <i>CEBPA</i>  | <i>GATA2</i>  | <i>JAK3</i>  | <i>MPL</i>    | <i>PHF6</i>   | <i>STAG2</i>  | <i>WHSC1L1</i> |
| <i>CARD11</i> | <i>CREBBP</i> | <i>HRAS</i>   | <i>KDM6A</i> | <i>MYC</i>    | <i>PIK3CA</i> | <i>SUZ12</i>  | <i>WT1</i>     |
| <i>CBL</i>    | <i>CSF3R</i>  | <i>ID3</i>    | <i>KIT</i>   | <i>MYD88</i>  | <i>PTEN</i>   | <i>TCF3</i>   | <i>ZRSR2</i>   |

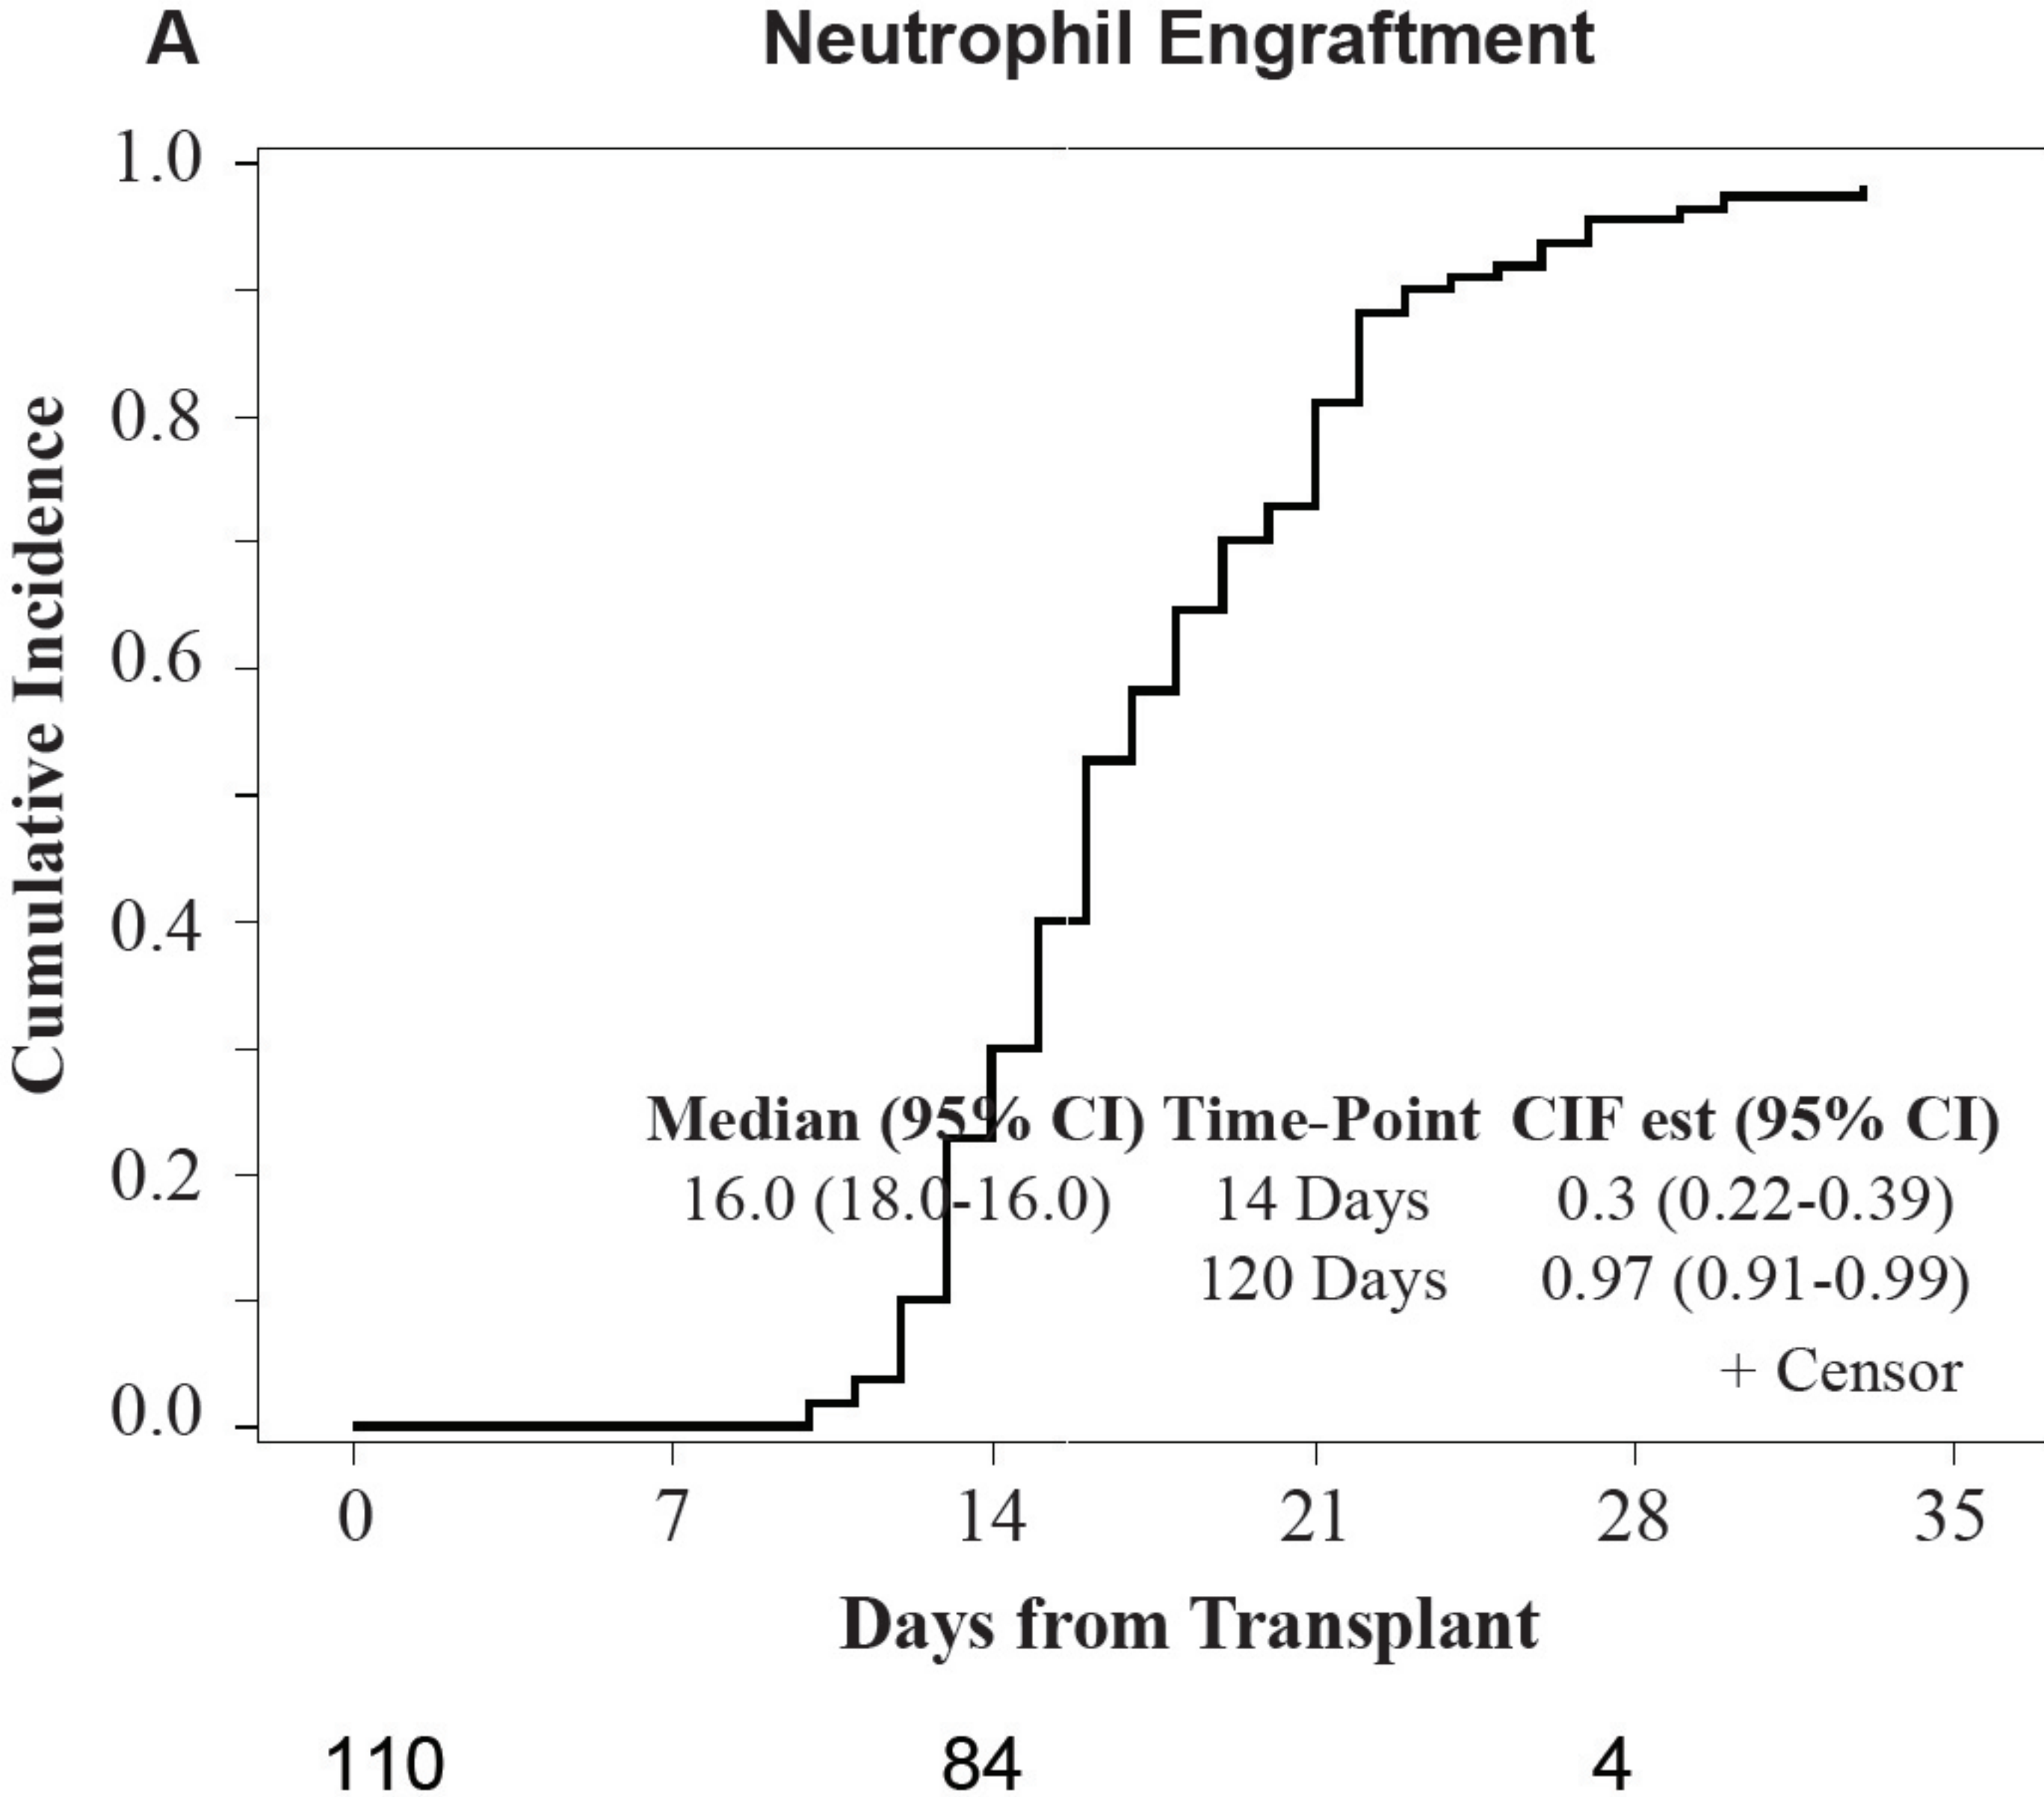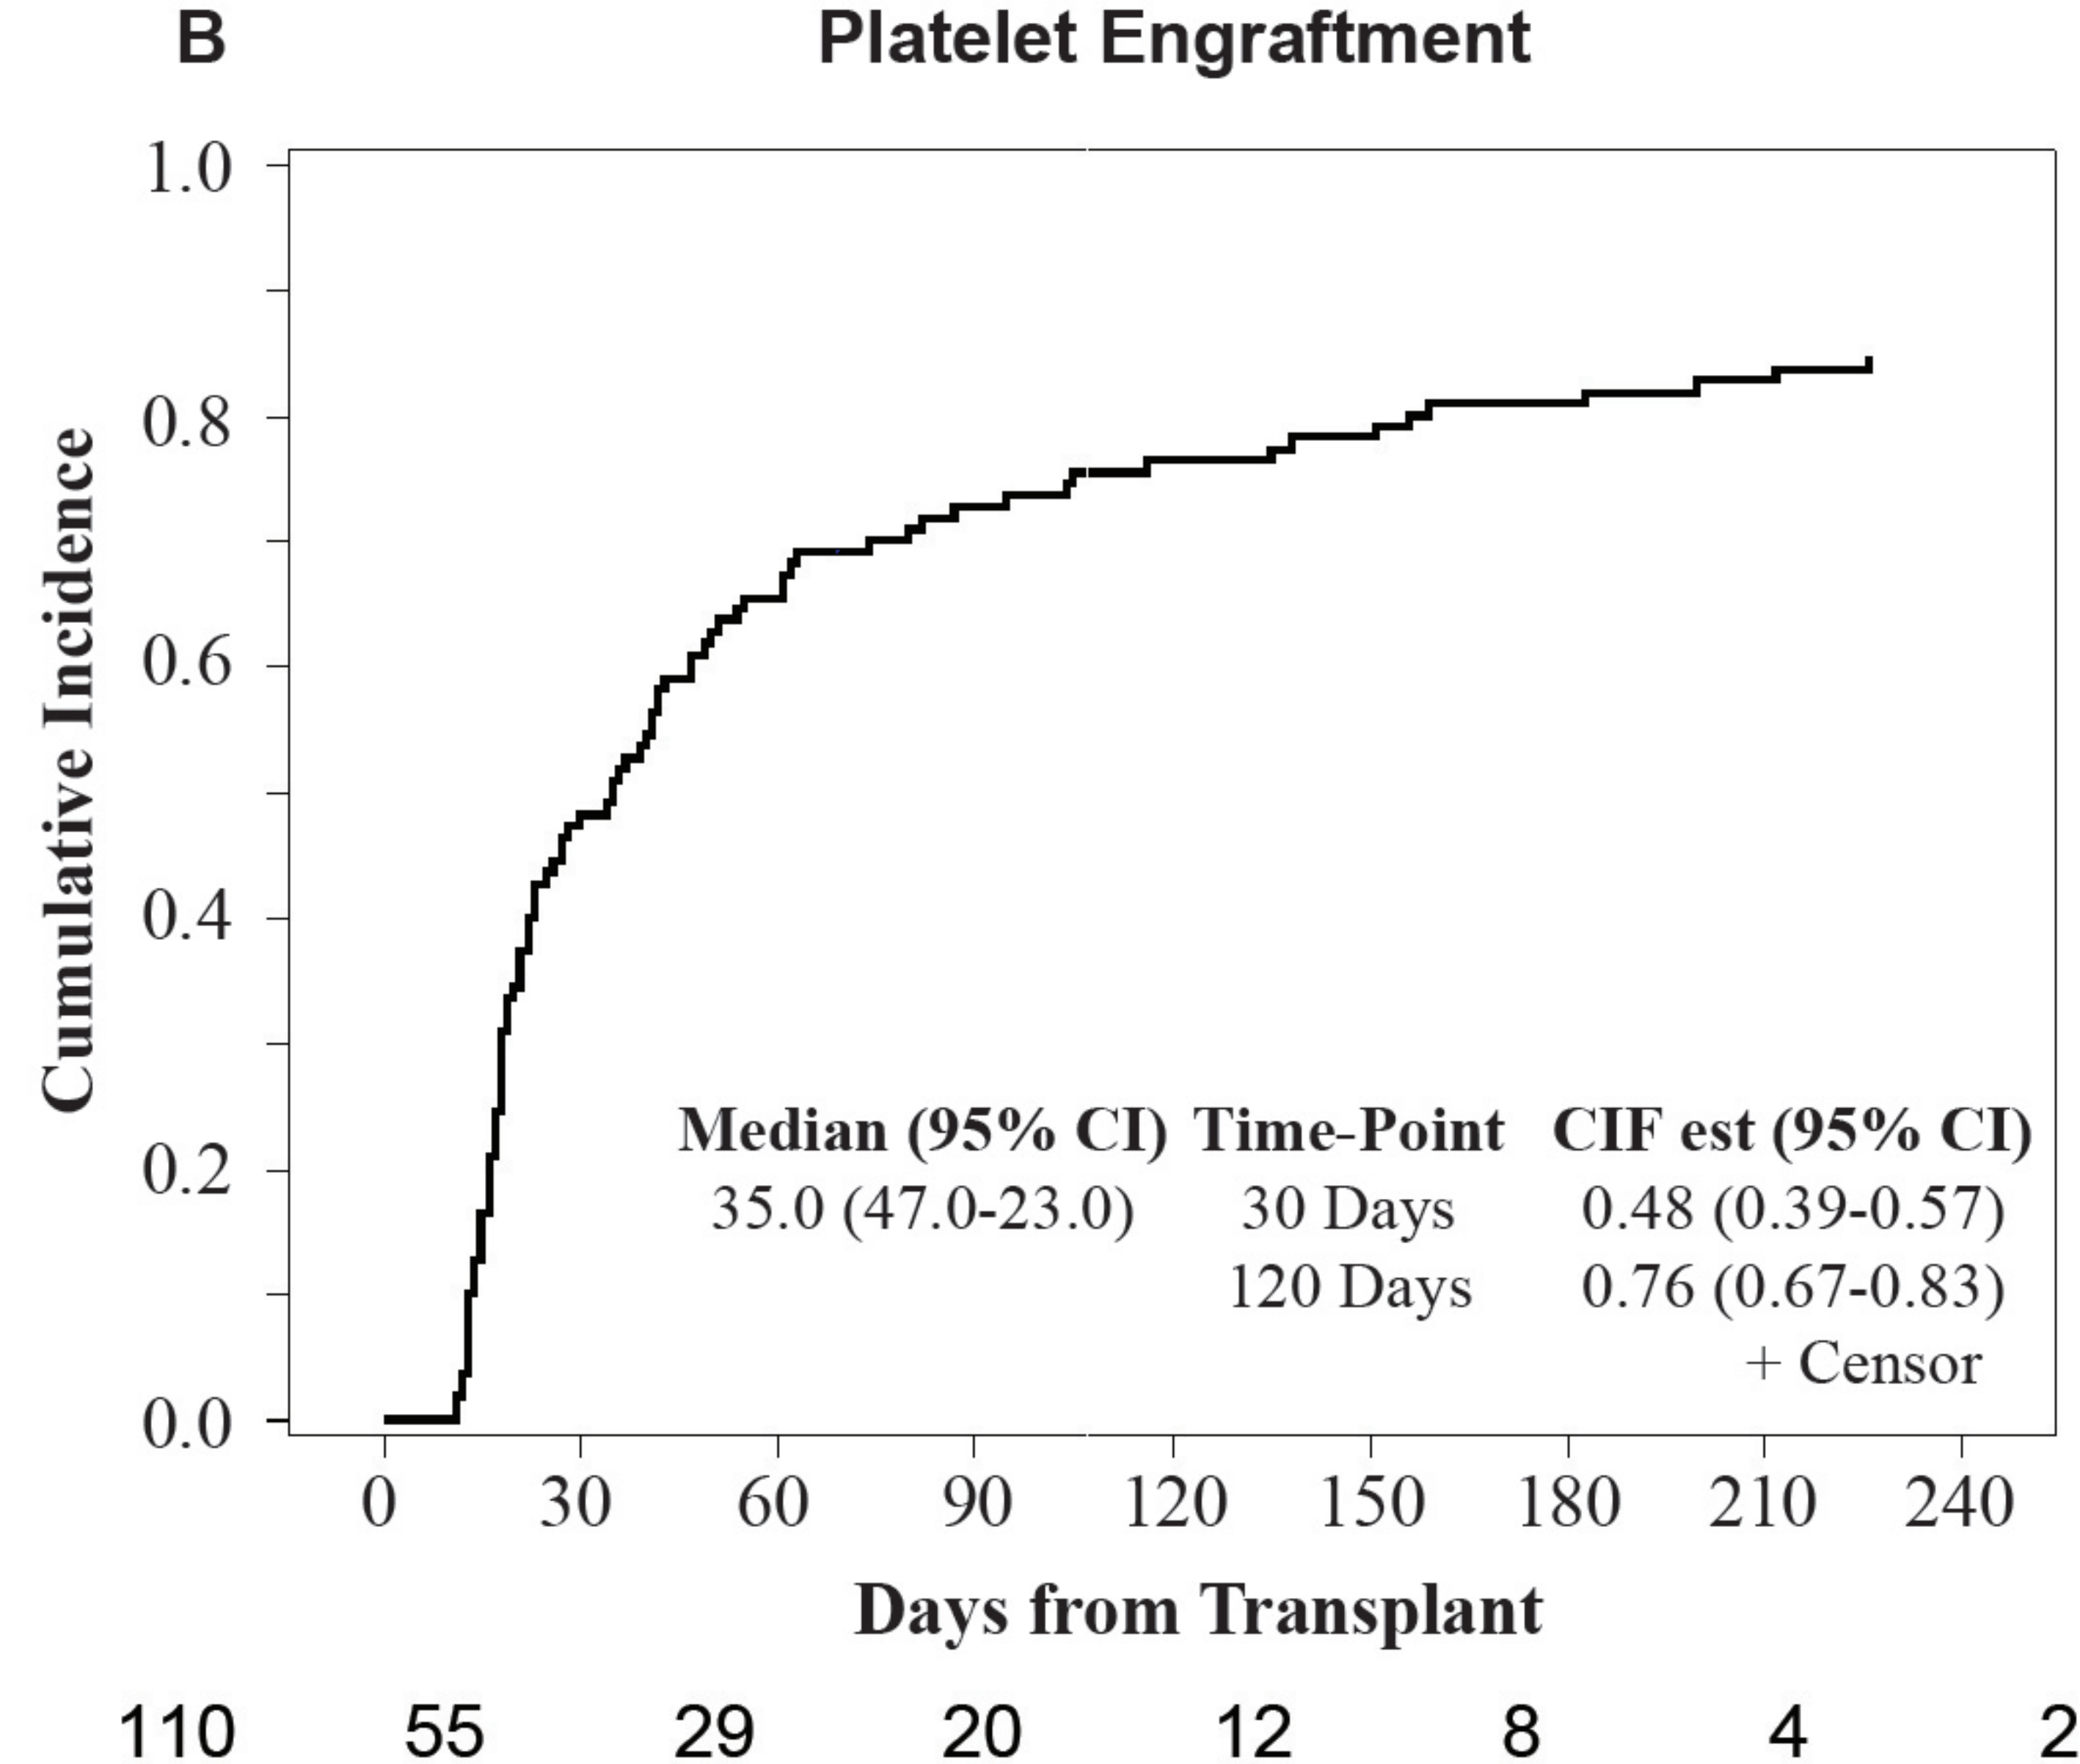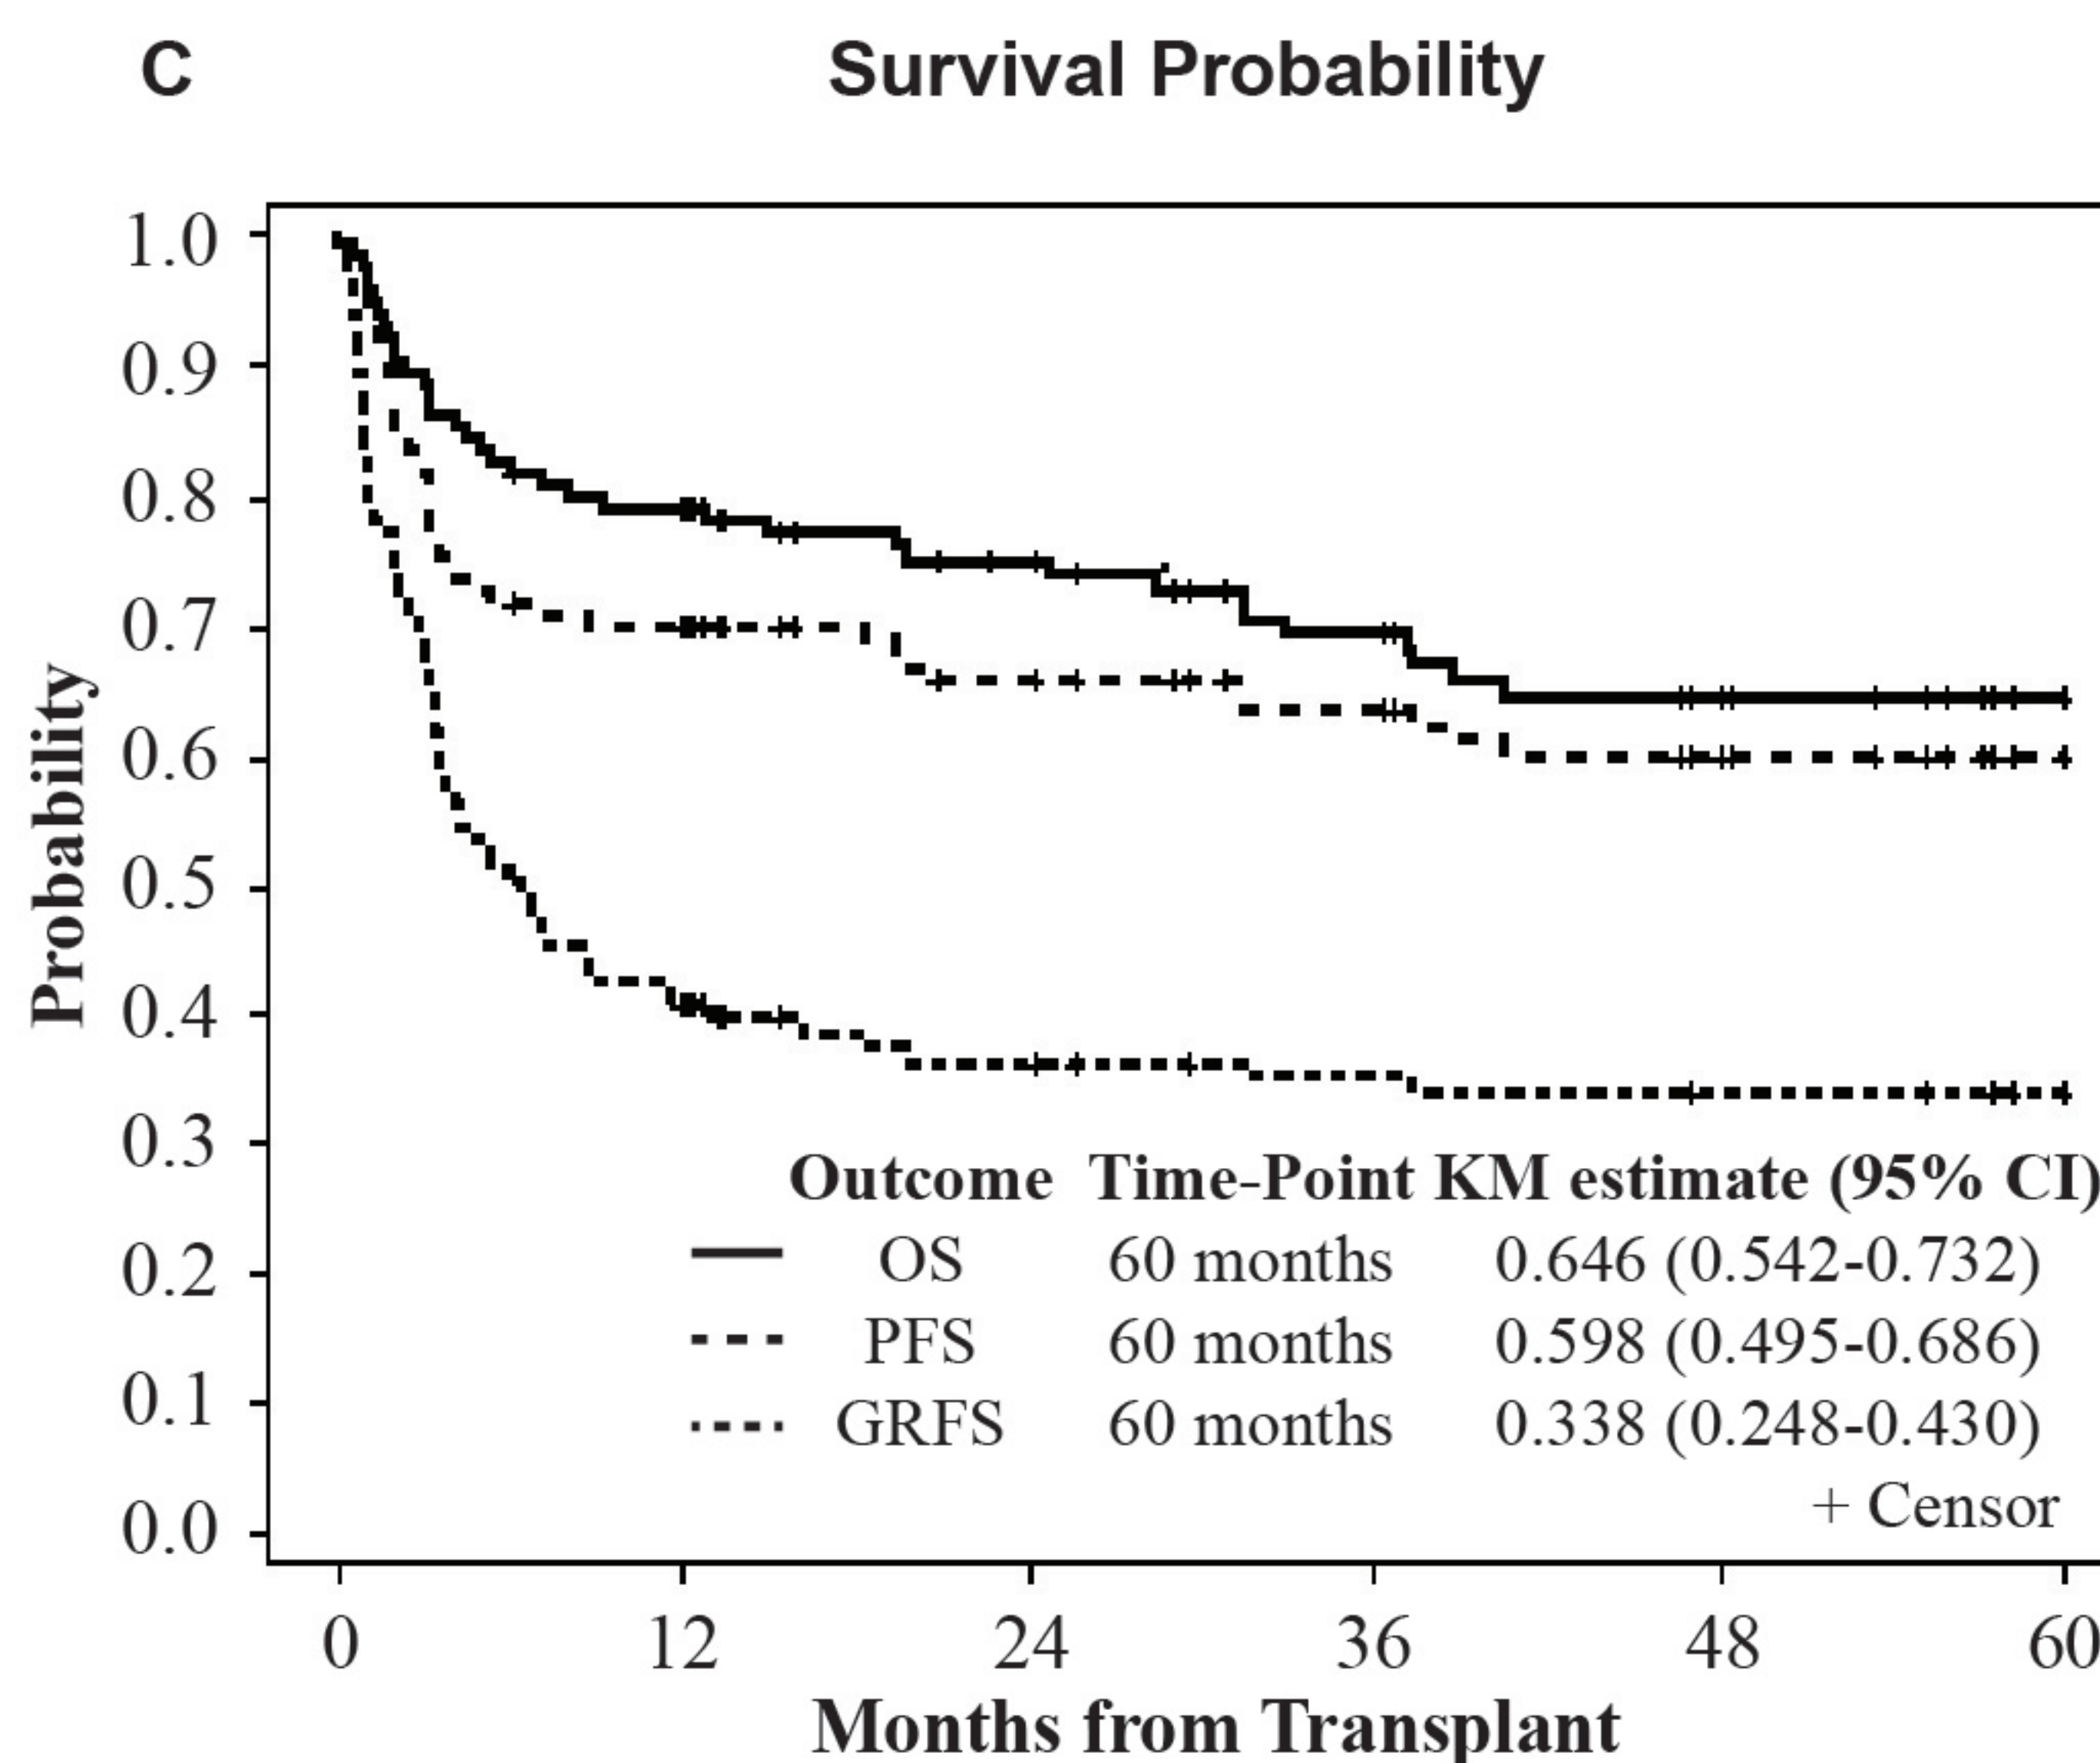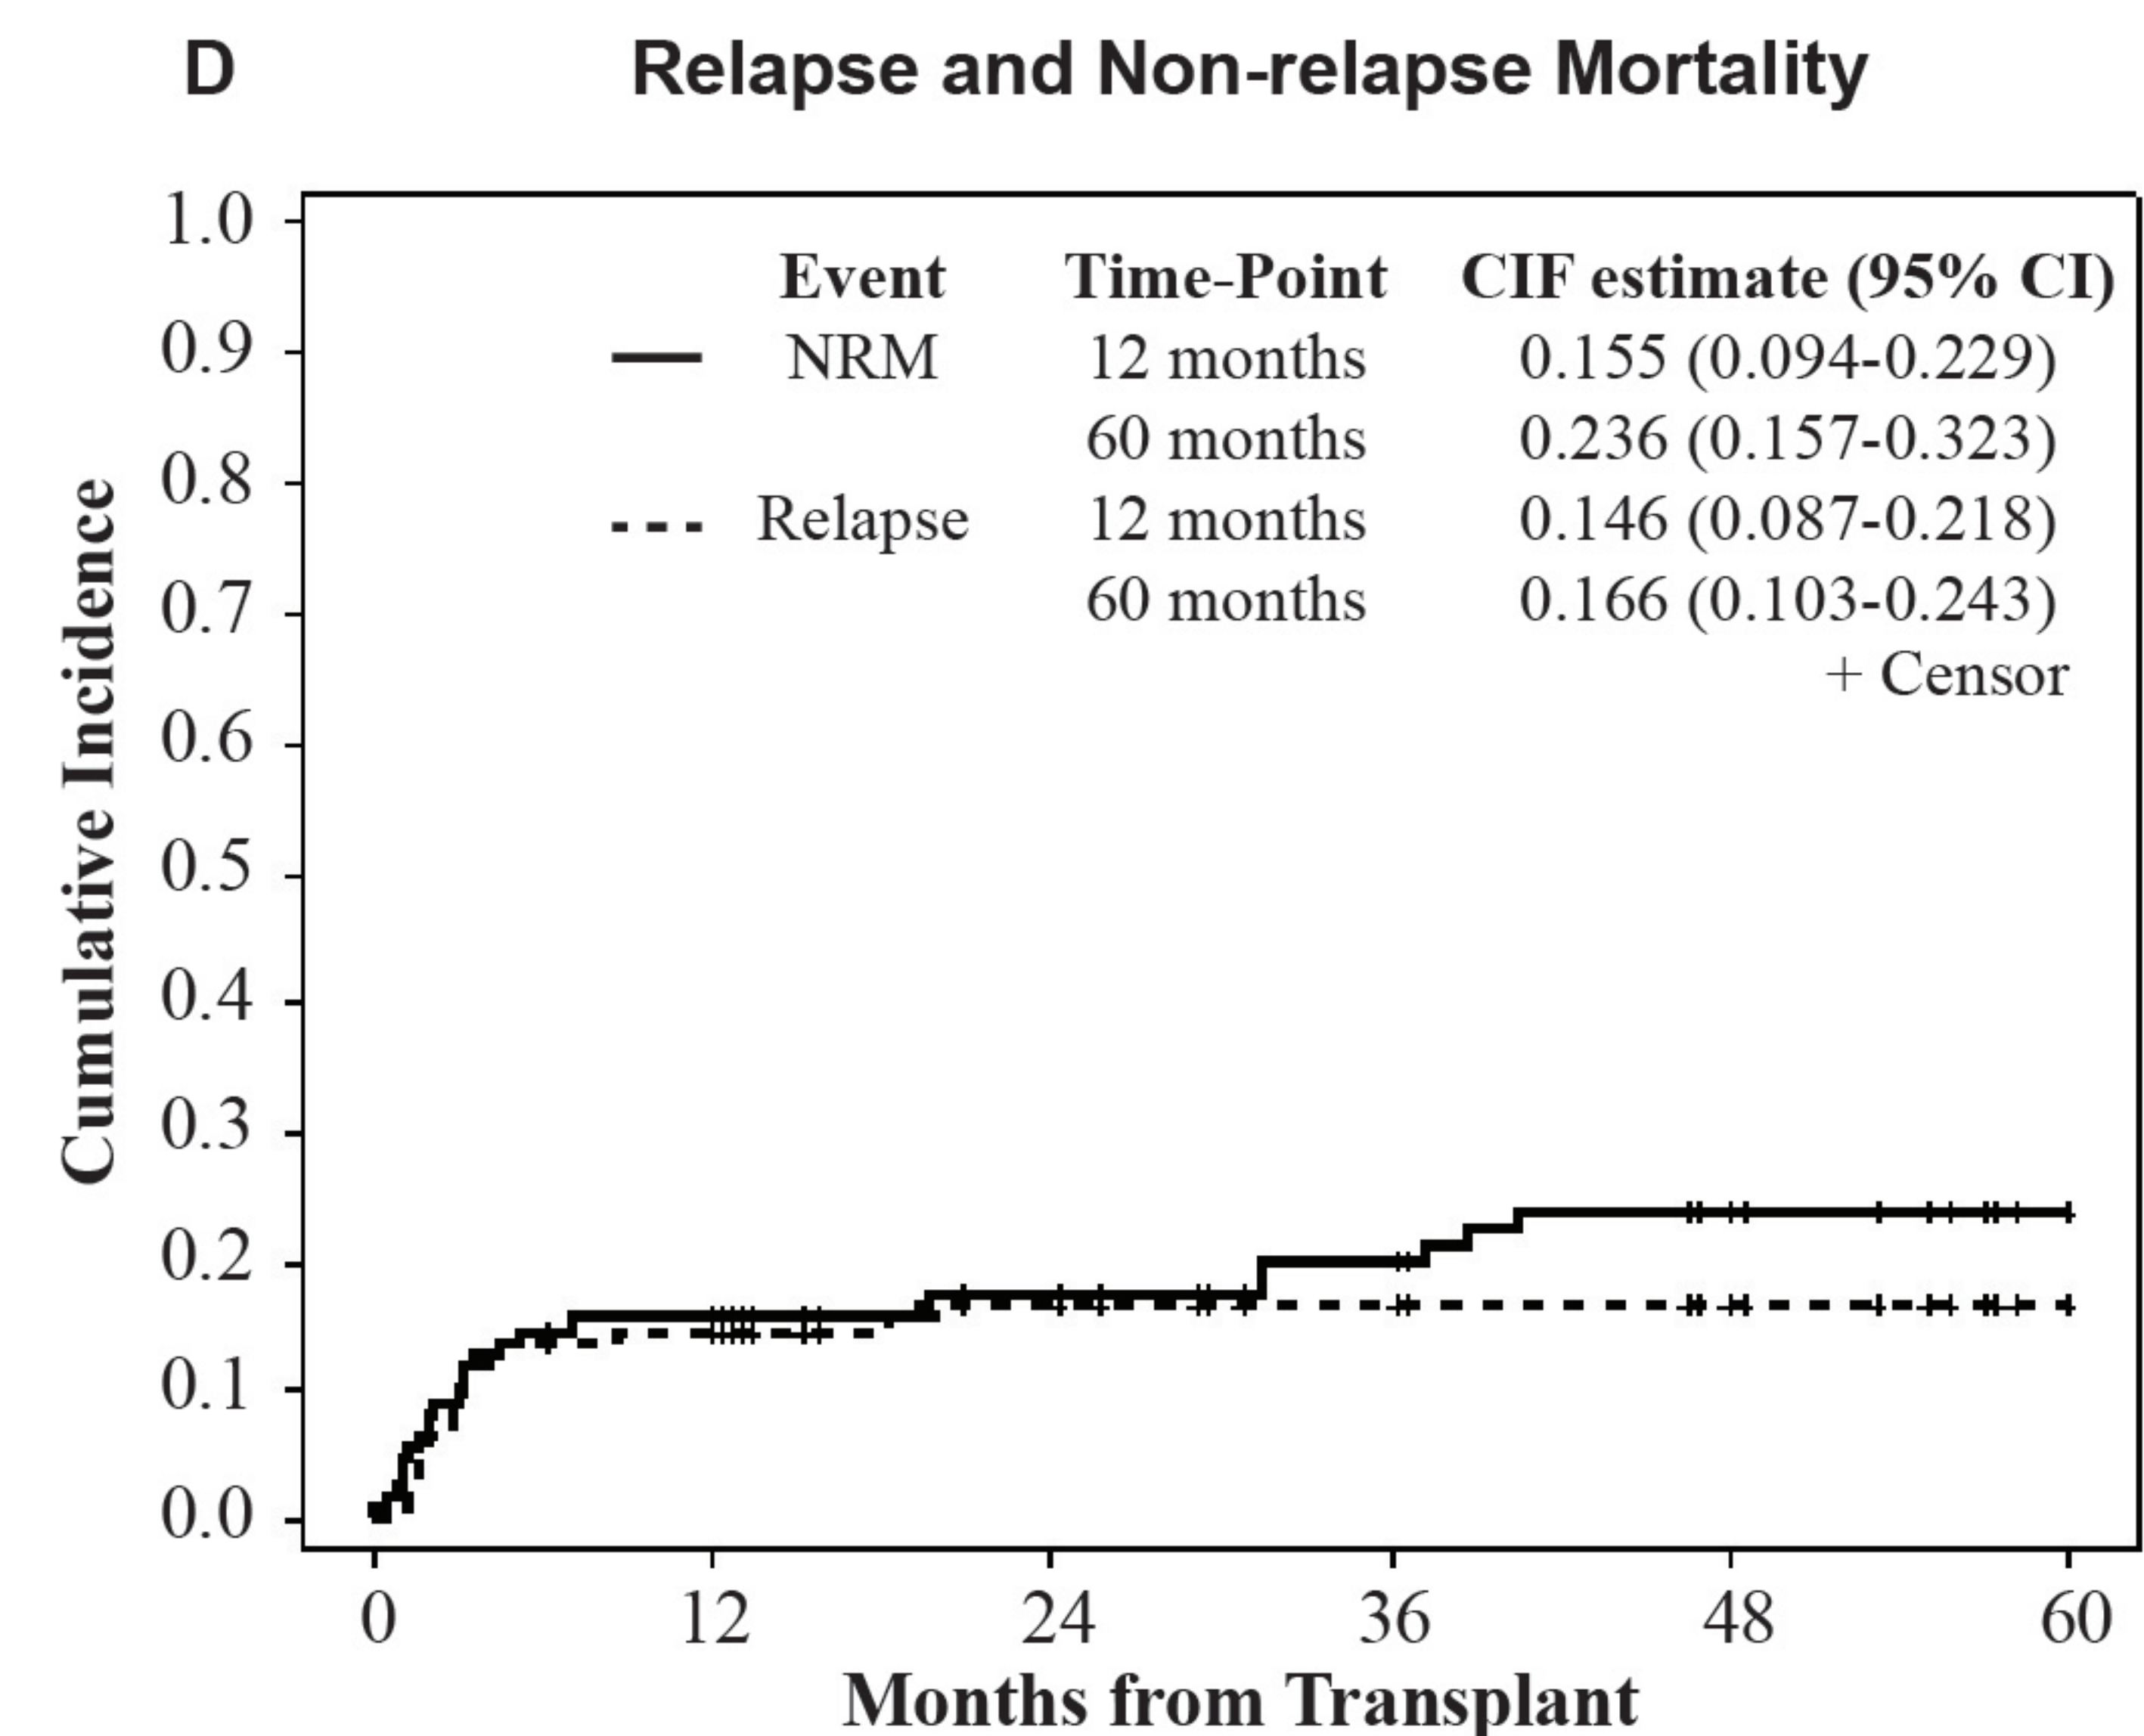

|      |     |    |    |    |    |    |
|------|-----|----|----|----|----|----|
| OS   | 110 | 85 | 71 | 60 | 52 | 44 |
| PFS  | 110 | 75 | 62 | 54 | 47 | 39 |
| GRFS | 110 | 43 | 32 | 28 | 26 | 23 |

|         |     |    |    |    |    |    |
|---------|-----|----|----|----|----|----|
| NRM     | 110 | 75 | 62 | 54 | 47 | 39 |
| Relapse | 110 | 75 | 62 | 54 | 47 | 39 |

**Supplementary Figure 1.** AlloHCT outcomes (A) Neutrophil engraftment at 14 and 120 days post alloHCT, (B) Platelet engraftment at 30 and 120 days post allo-HCT, (C) Overall survival, progression-free survival, and GVHD-free relapse-free survival at 60 months post allo-HCT, and (D) Relapse and none-relapse mortality at 12 and 60 months post alloHCT.

# Survival Outcome Post AlloHCT

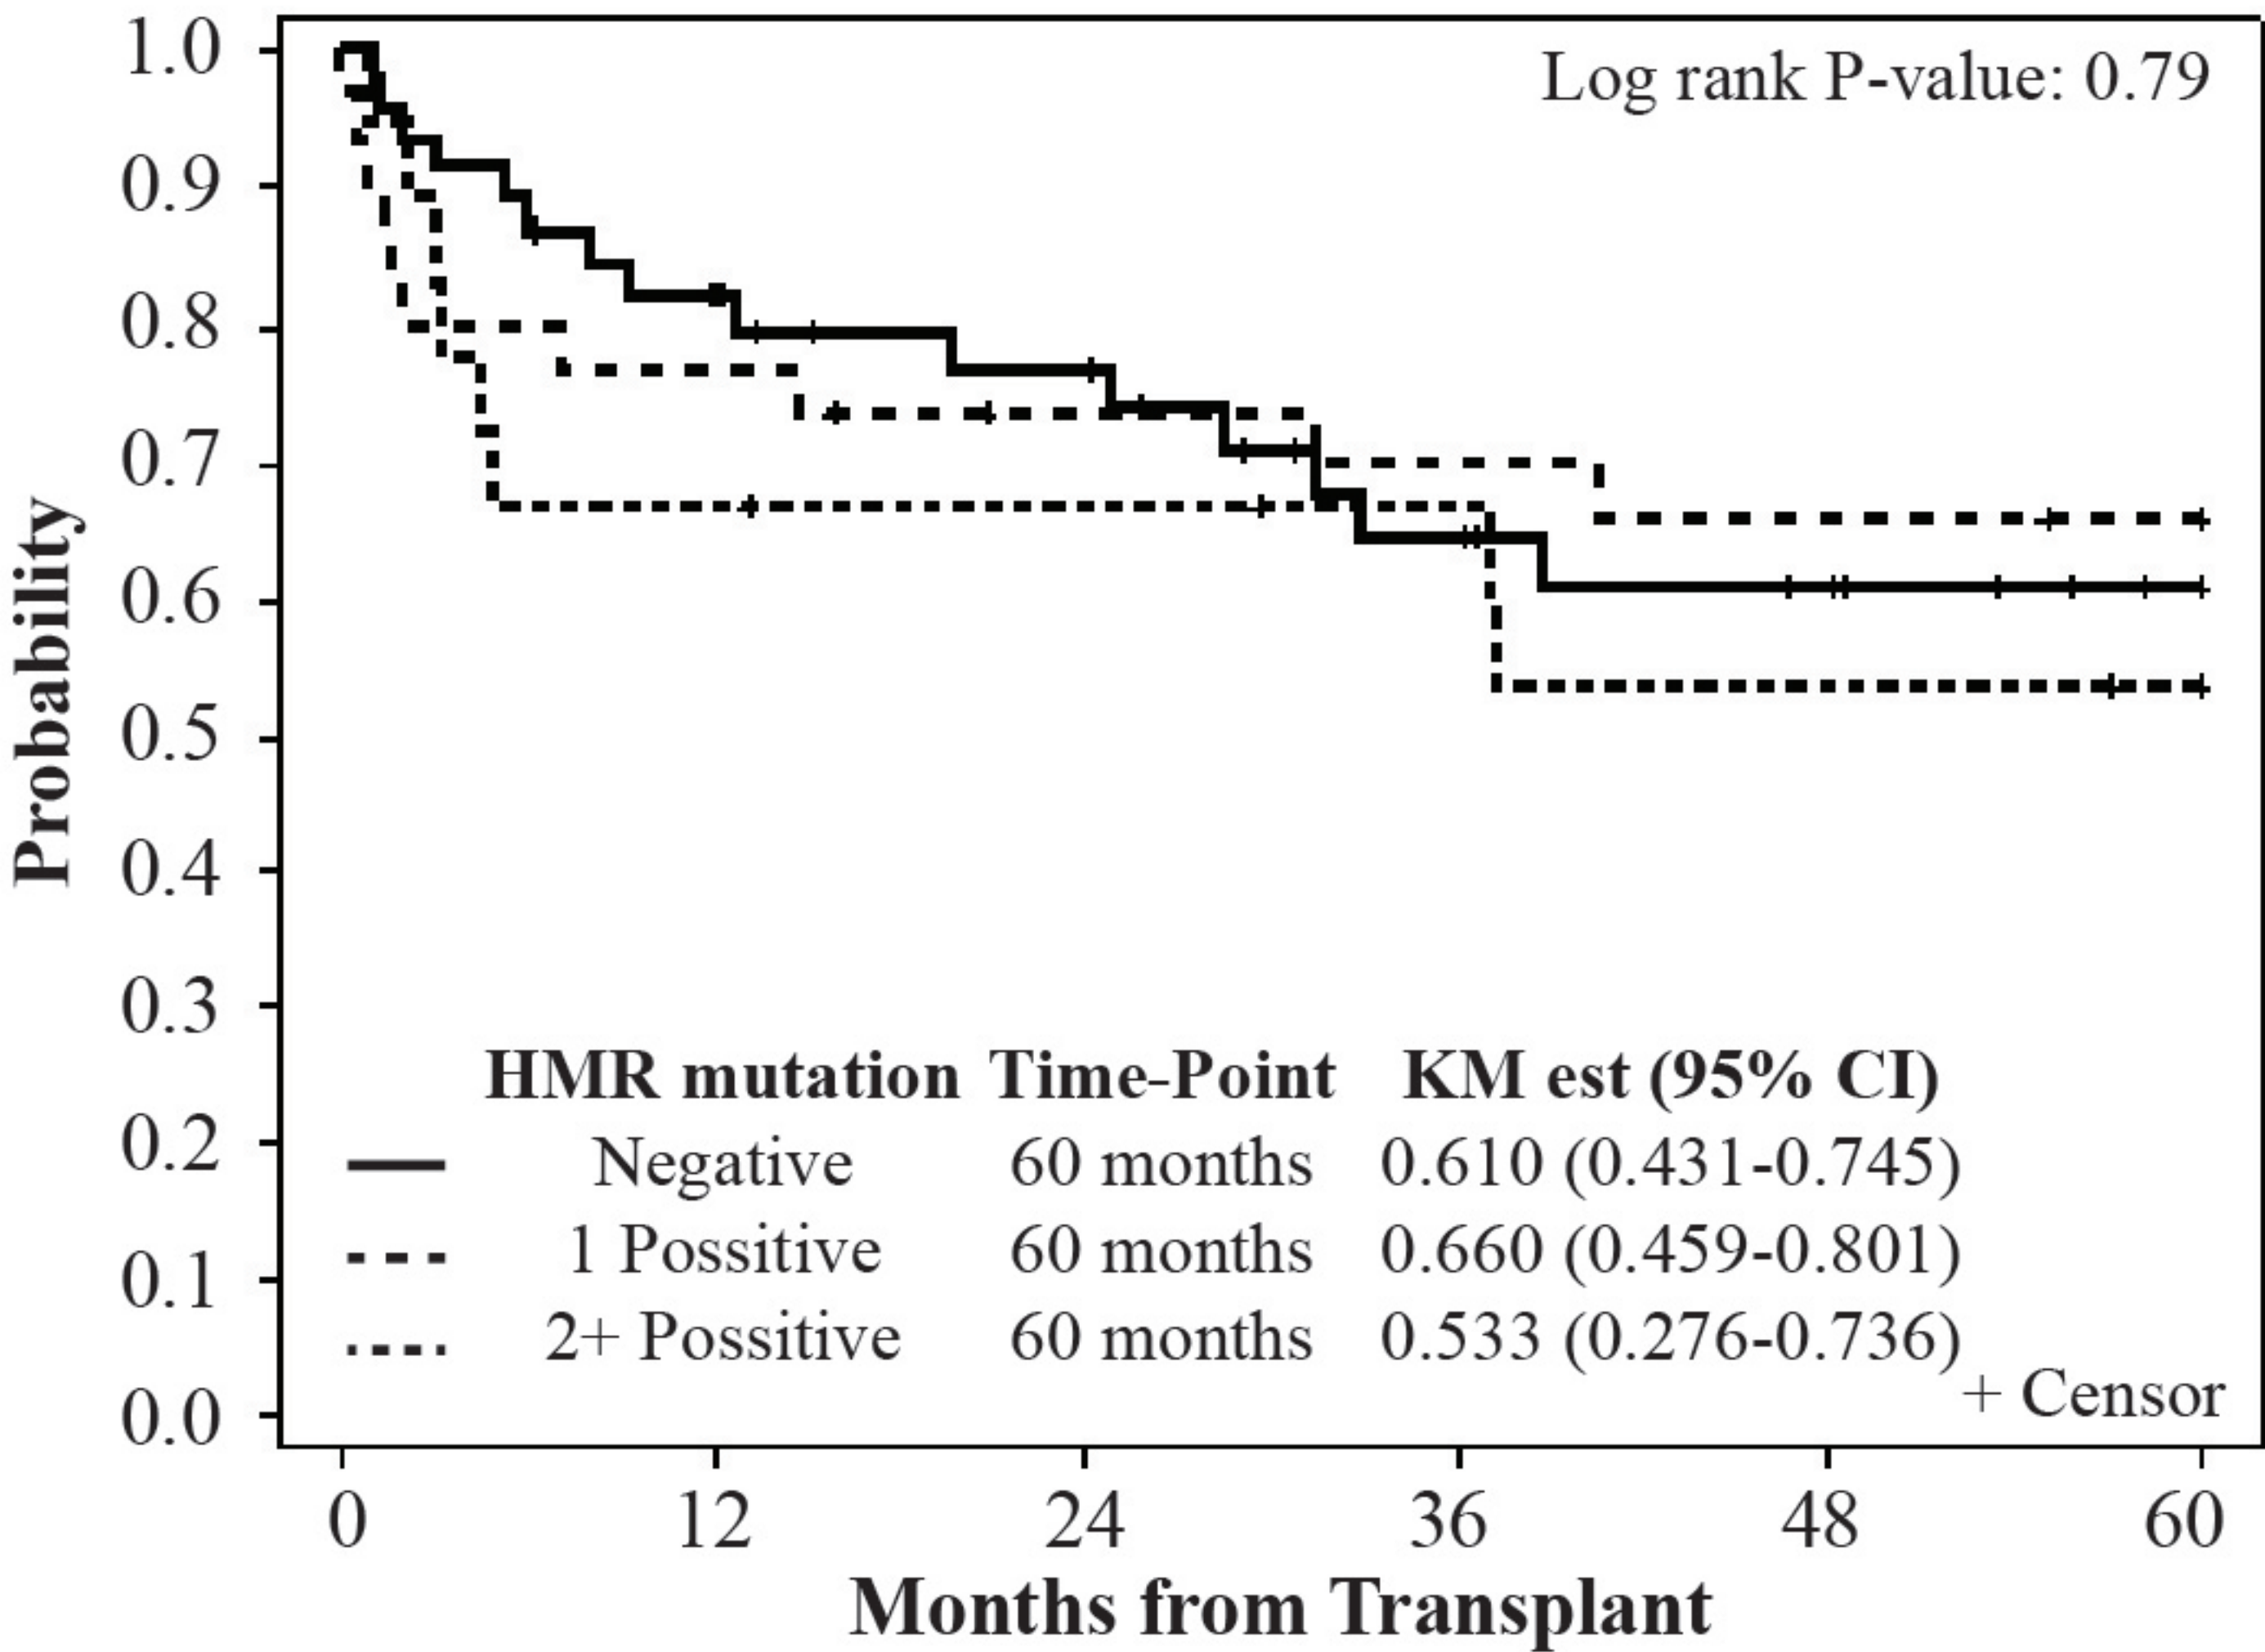

|             |    |    |    |    |    |    |
|-------------|----|----|----|----|----|----|
| Negative    | 45 | 35 | 28 | 20 | 16 | 11 |
| 1 Positive  | 30 | 23 | 20 | 19 | 18 | 17 |
| 2+ Positive | 18 | 12 | 11 | 10 | 8  | 7  |

**Supplementary Figure 2.** Survival outcome at 60 months post alloHCT based on the HMR status (negative, 1 or 2+ positive).

A

MIPSS70

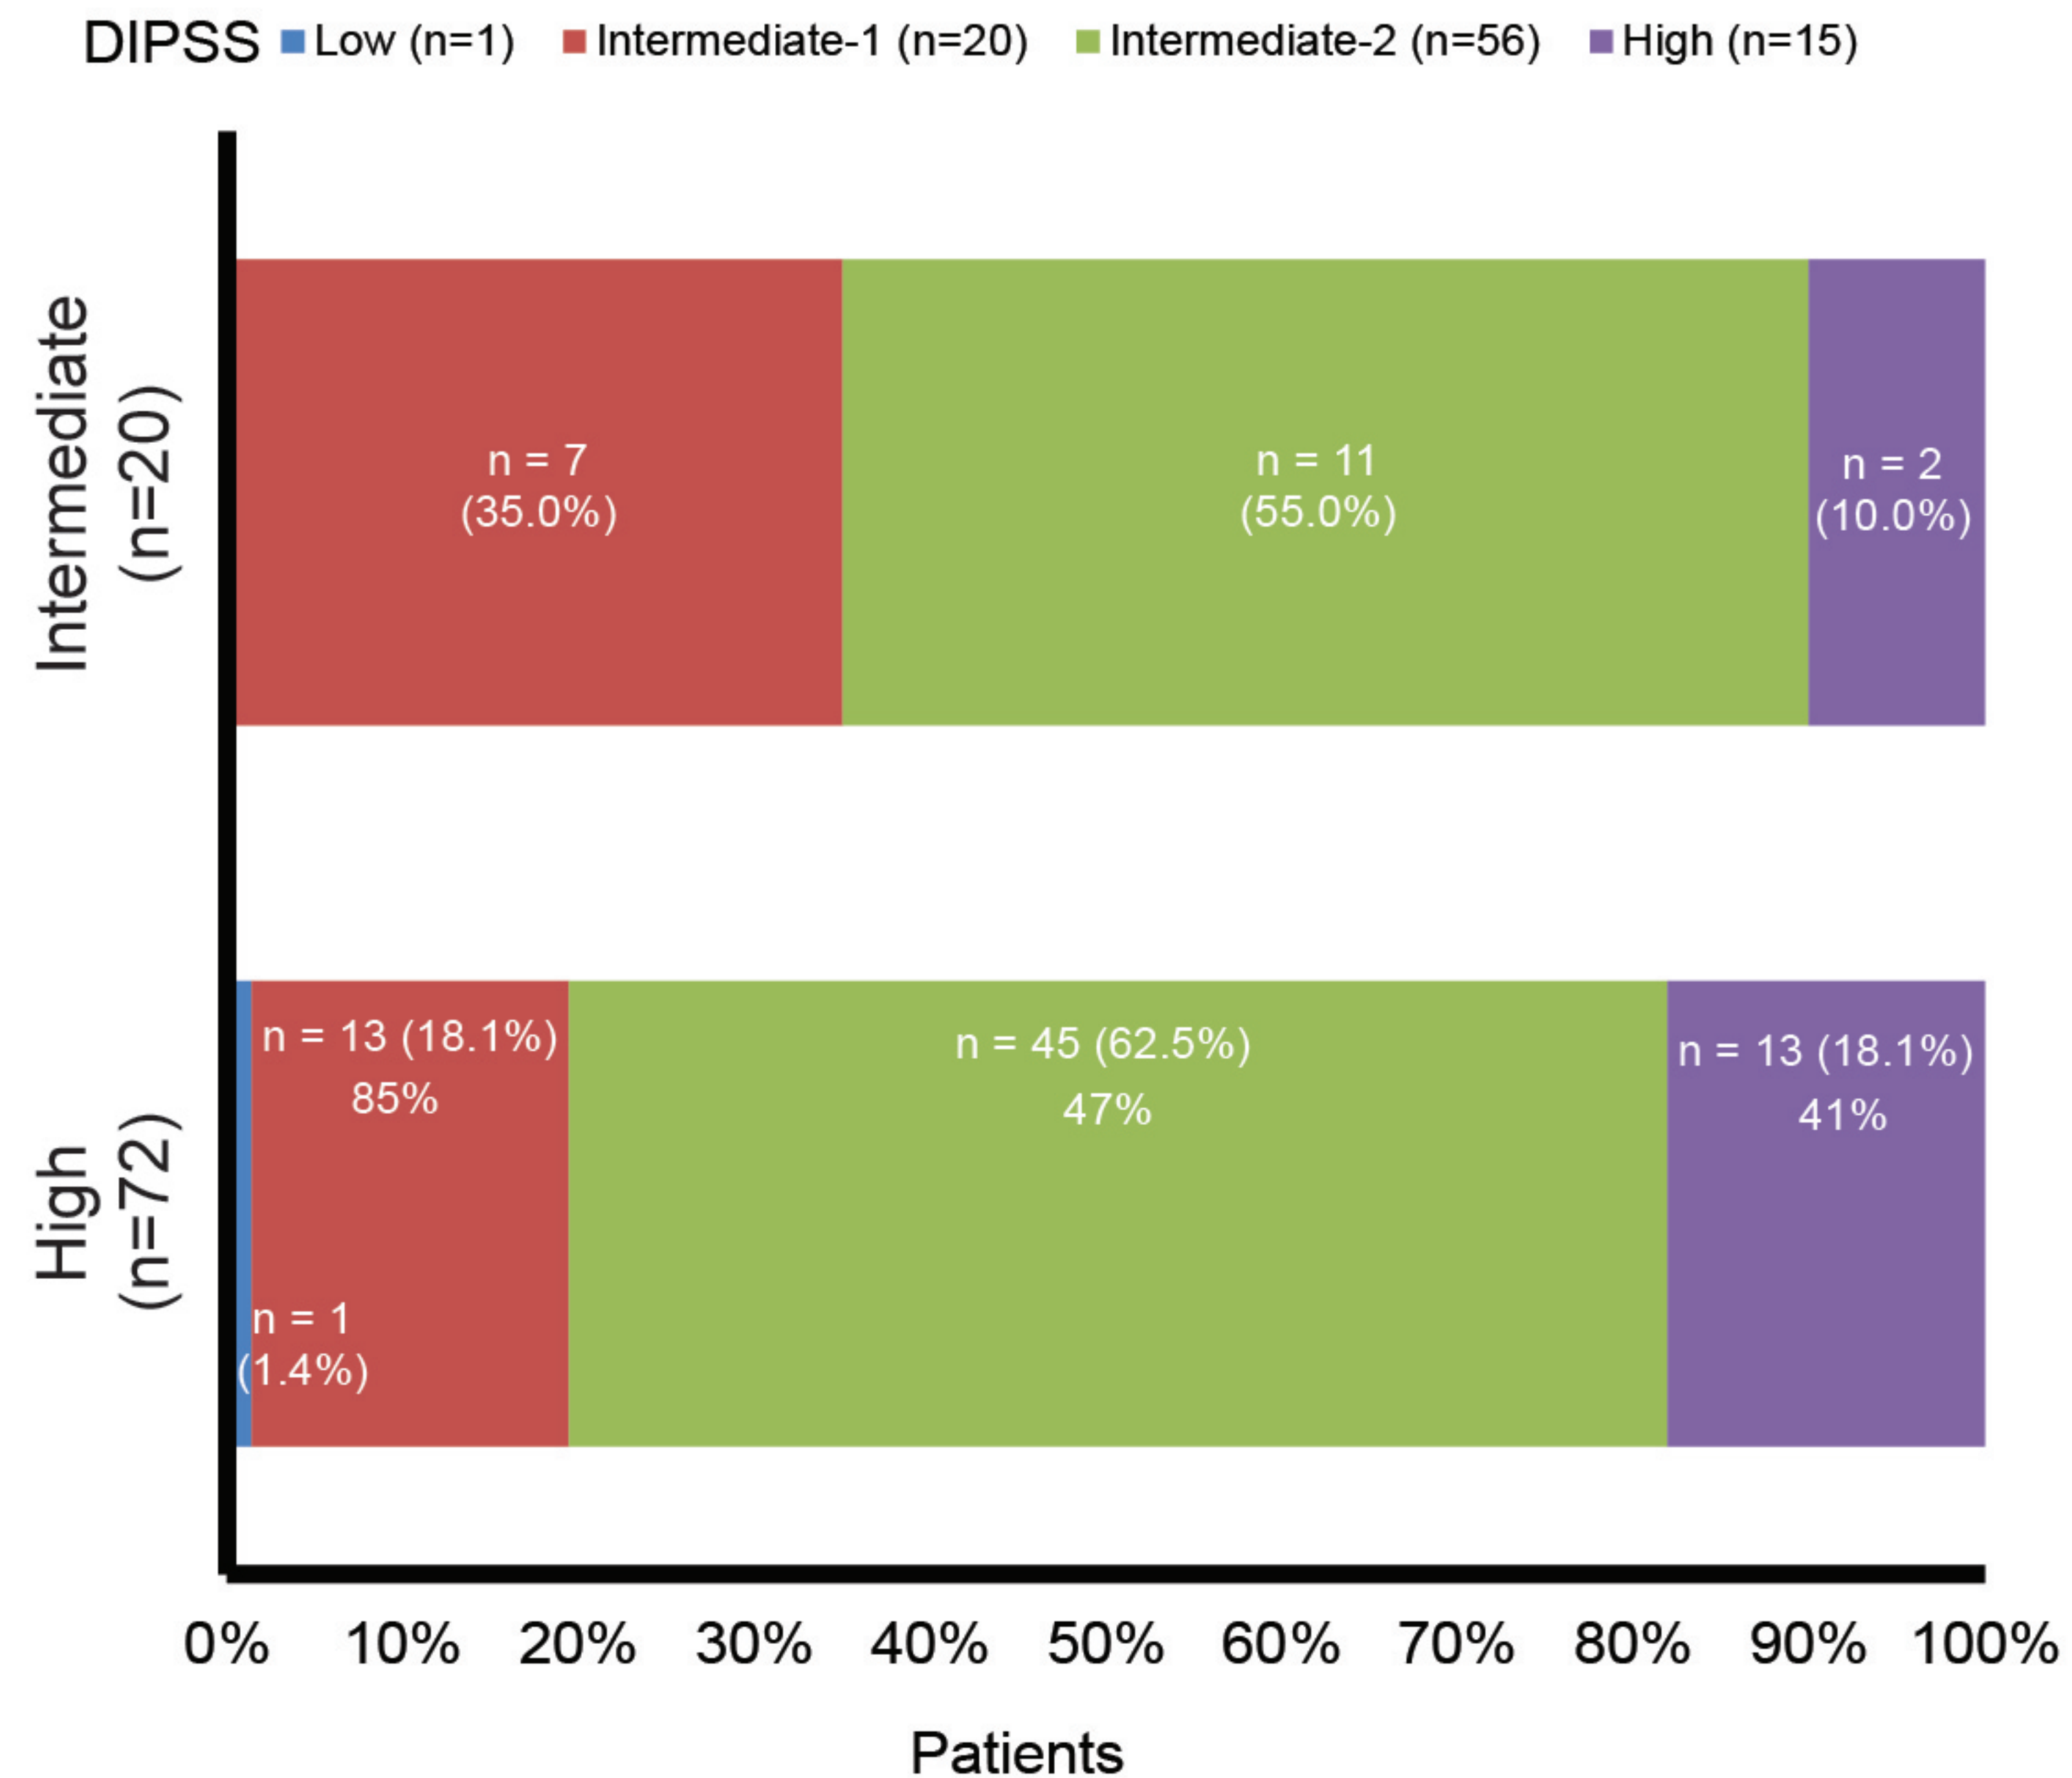

B

MIPSS70+ V2.0

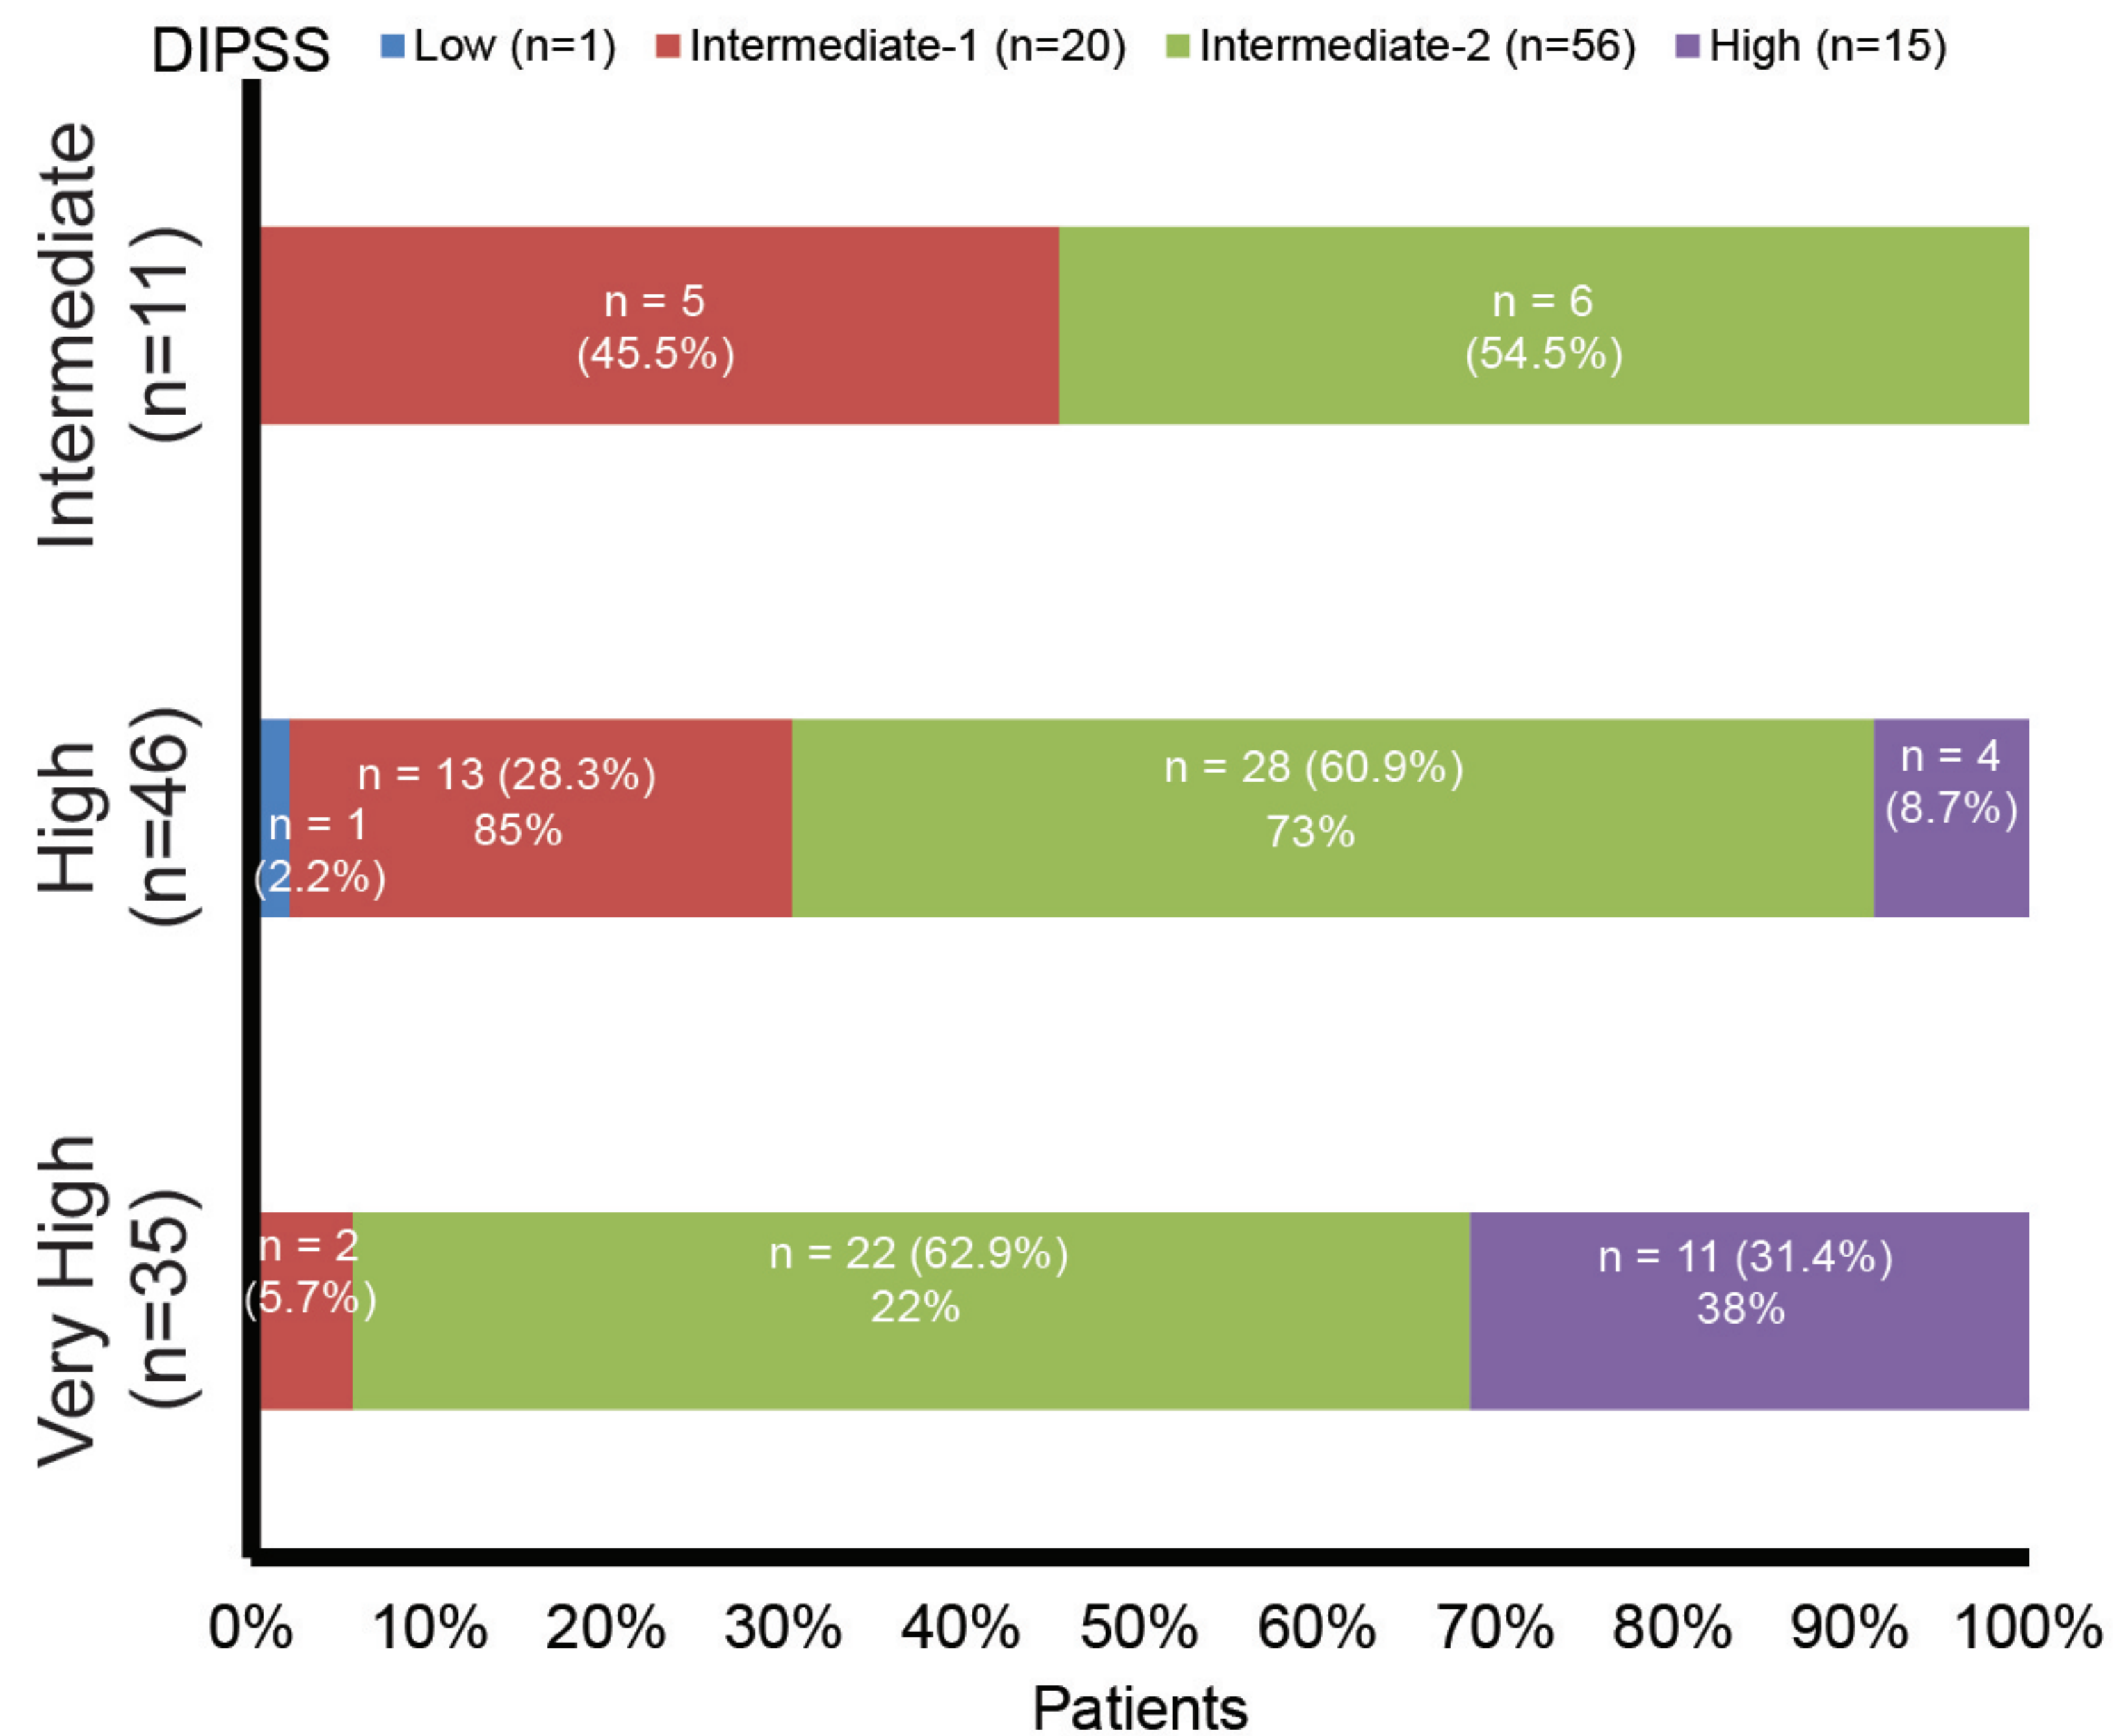

**Supplementary Figure 3.** Comparison of patients' distribution by DIPSS category with (A) MIPSS70 and (B) MIPSS70+ V2.0
